# Supplementary material for: Structural isomerism in (p-XC6H4)SeCl3 and (p-XC6H4)SeBr3 (X = F, Cl) compounds. Co-crystallisation of cis- and trans-dimeric forms of (p-ClC6H4)SeCl2(μ-Cl)2(p-ClC6H4)SeCl2. A new structural modification for the “PhSeBr” reagent, Ph2Se2Br2, containing an elongated Se–Se bond
Source: Royal Society of Chemistry journal article supplement (doi:10.1039/c2dt31539d), 2012-01-01
Supplement: c2dt31539d.pdf [file c2dt31539d.pdf]

**Supplementary data for the paper “Structural isomerism in  $(p\text{-XC}_6\text{H}_4)\text{SeCl}_3$  and  $(p\text{-XC}_6\text{H}_4)\text{SeBr}_3$  ( $\text{X} = \text{F}, \text{Cl}$ ) compounds. Co-crystallisation of *cis*- and *trans*- dimeric forms of  $(p\text{-ClC}_6\text{H}_4)\text{SeCl}_2(\mu\text{-Cl})_2(p\text{-ClC}_6\text{H}_4)\text{SeCl}_2$ . A new structural modification for the “PhSeBr” reagent,  $\text{Ph}_2\text{Se}_2\text{Br}_2$ , containing an elongated Se–Se bond.”**

## Crystal packing features:

### $(p\text{-FC}_6\text{H}_4)\text{SeCl}_3$ and $(p\text{-FC}_6\text{H}_4)\text{SeBr}_3$ :

The extended structures of  $(p\text{-FC}_6\text{H}_4)\text{SeCl}_3$  and  $(p\text{-FC}_6\text{H}_4)\text{SeBr}_3$  both show identical features as the two structures are isomorphous. The extended structures viewed down the  $a$ -axis are shown in Figure S1 below.

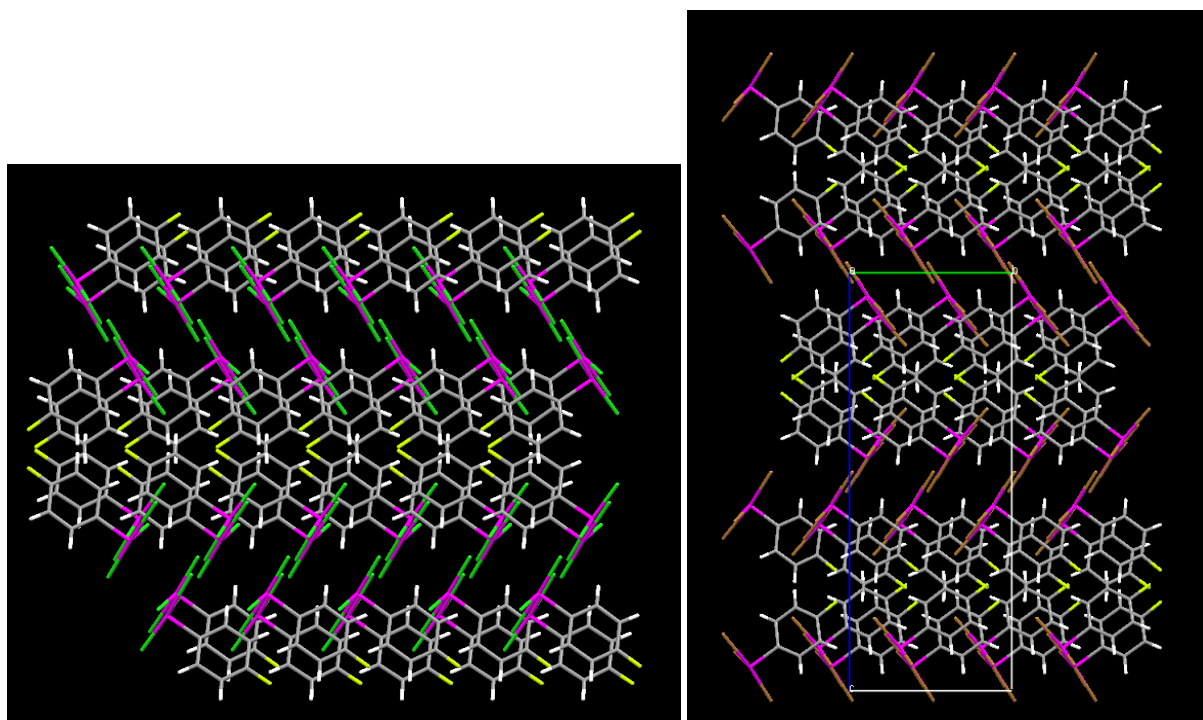

**Figure S1** Extended structures of  $(p\text{-FC}_6\text{H}_4)\text{SeCl}_3$  and  $(p\text{-FC}_6\text{H}_4)\text{SeBr}_3$ , viewed in each case down the crystallographic  $a$ -axis, showing the presence of a herringbone arrangement for the planar  $\text{Se}_2\text{X}_6$  group of atoms throughout the crystal packing.

Alternating stacks of the dimer pairs are present, which pack in a herringbone fashion. The stacks link to neighbouring stacks via weak  $\text{X}\cdots\text{X}$  contacts. In  $(p\text{-FC}_6\text{H}_4)\text{SeCl}_3$  there is a weak  $\text{Cl}(6)\cdots\text{Cl}(6)$  contact of  $3.450(3)$  Å, which is slightly shorter than the sum of twice the van der Waals radii of chlorine ( $3.50$  Å). Similarly, in  $(p\text{-FC}_6\text{H}_4)\text{SeBr}_3$  there is a weak  $\text{Br}(1)\cdots\text{Br}(1)$  contact of  $3.568(3)$  Å (*c.f.* twice the van der Waals radii of bromine,  $3.70$  Å).

There is also extensive  $\pi$ -stacking throughout both structures, which is best viewed down the  $c$ -axis, as shown in Figure S2 below.

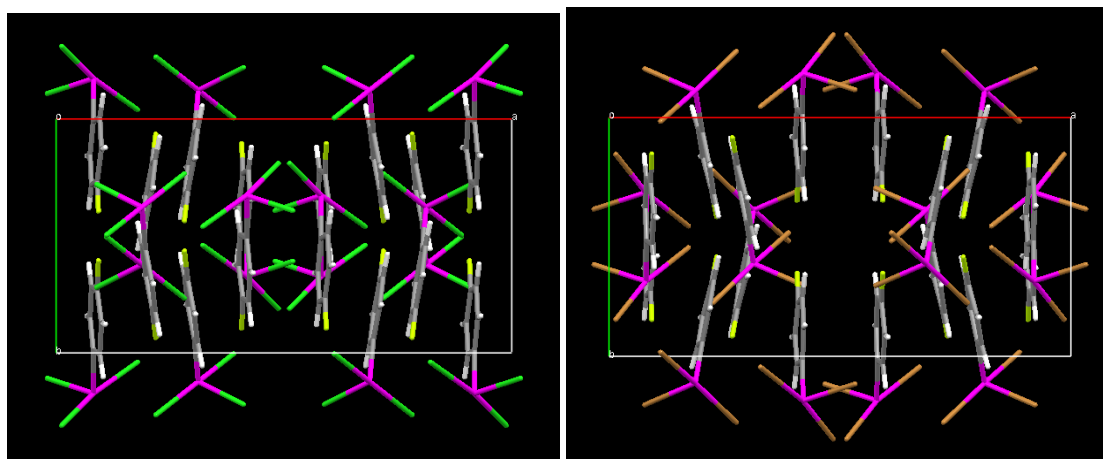

**Figure S2** Extended structures of  $(p\text{-FC}_6\text{H}_4)\text{SeCl}_3$  (left) and  $(p\text{-FC}_6\text{H}_4)\text{SeBr}_3$  (right) viewed down the crystallographic  $c$ -axis, showing extensive  $\pi$ -stacking throughout the structures.

The presence of  $\pi$ -stacking of the  $p\text{-FC}_6\text{H}_4$  rings, and aggregation of the fluorine atoms into fluorophilic regions, are also apparent in the crystal packing. Whilst there are no short  $\text{F}\cdots\text{F}$  contacts in either structure, there are short  $\text{F}\cdots\text{H}$  contacts in each structure,  $\text{F}(4)\cdots\text{H}(11)$ : 2.59 Å and  $\text{F}(10)\cdots\text{H}(6)$ : 2.56 Å in  $(p\text{-FC}_6\text{H}_4)\text{SeCl}_3$ , and  $\text{F}(1)\cdots\text{H}(8)$ : 2.53 Å in  $(p\text{-FC}_6\text{H}_4)\text{SeBr}_3$ .

**(*p*-ClC<sub>6</sub>H<sub>4</sub>)SeCl<sub>3</sub>:**

In the extended structure of (*p*-ClC<sub>6</sub>H<sub>4</sub>)SeCl<sub>3</sub> the molecules of *cis*-dimers and *trans*-dimers stack down the crystallographic *b*-axis, and are linked by a combination of Se...Cl and Cl...Cl contacts, as shown in Figure S3 below.

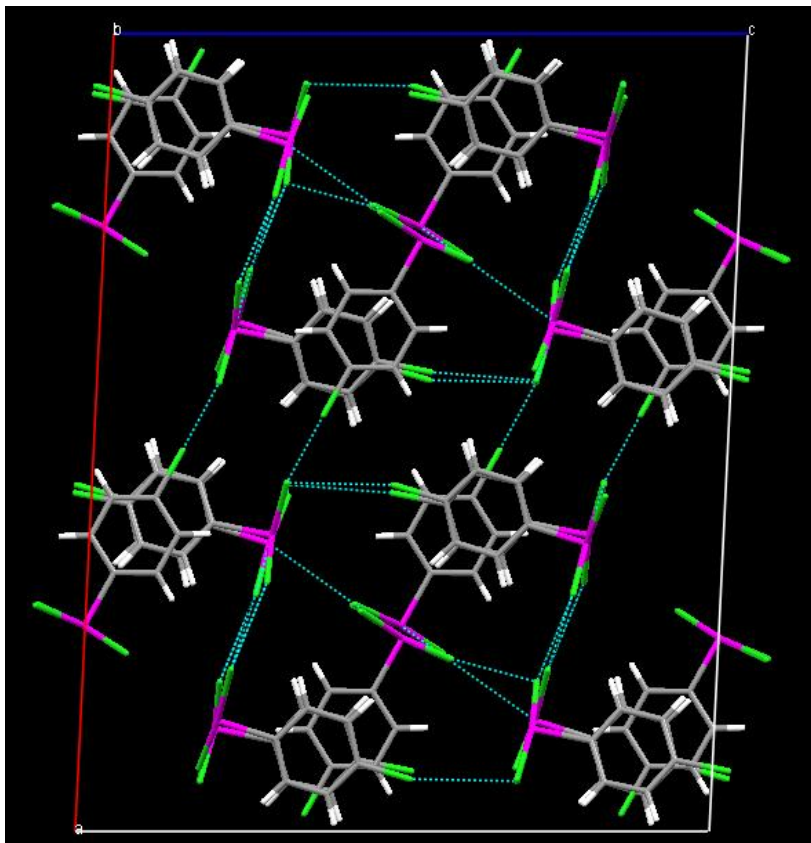

**Figure S3** Packing of (*p*-ClC<sub>6</sub>H<sub>4</sub>)SeCl<sub>3</sub> viewed down the crystallographic *b*-axis.

The unusual co-crystallisation of both *cis*- and *trans*-dimers in the structure of (*p*-ClC<sub>6</sub>H<sub>4</sub>)SeCl<sub>3</sub> results in a number of interesting packing features. Stacks of *cis*- and *trans*-dimers are linked by an Se...Cl contact to the vacant sixth coordination site at atom Se(1) on the *cis*-dimer, Se(1)...Cl(11): 3.3542(19) Å. There are Cl...Cl contacts present between one of the terminal Se–Cl chlorine atoms and one of the bridging Se–Cl chlorine atoms on the *cis*-dimer with the aryl chlorine atoms of a neighbouring *cis*-dimer, Cl(4)...Cl(6): 3.423(3) Å, Cl(5)–Cl(8): 3.382(2) Å.

Extensive  $\pi$ -stacking of the *p*-ClC<sub>6</sub>H<sub>4</sub> rings is observed in the crystal packing, as shown in Figure S4 below. Whilst stacking of *p*-ClC<sub>6</sub>H<sub>4</sub> rings of the *cis*-dimer is close to parallel, more offset  $\pi$ -stacking also occurs with *p*-ClC<sub>6</sub>H<sub>4</sub> rings of the *trans*-dimer.

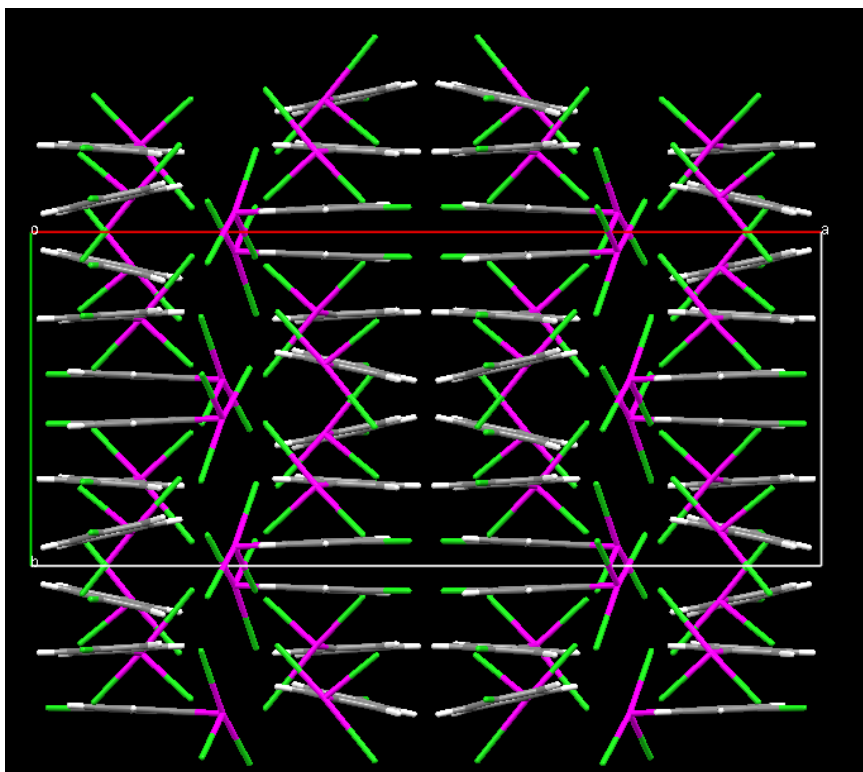

**Figure S4** Crystal packing of (p-ClC<sub>6</sub>H<sub>4</sub>)SeCl<sub>3</sub> viewed down the *c*-axis, showing the extent of  $\pi$ -stacking throughout the structure.

**(*p*-ClC<sub>6</sub>H<sub>4</sub>)SeBr<sub>3</sub>:**

The extended structure of (*p*-ClC<sub>6</sub>H<sub>4</sub>)SeBr<sub>3</sub> shows many similar features to the analogous trichloride. Dimer pairs stack down the *a*-axis (as shown in Figure S5 below), and are linked by Cl...H contacts from aryl chlorine to aryl protons, Br...H contacts from Se-Br atoms to aryl protons, and again by off-set  $\pi$ -stacking.

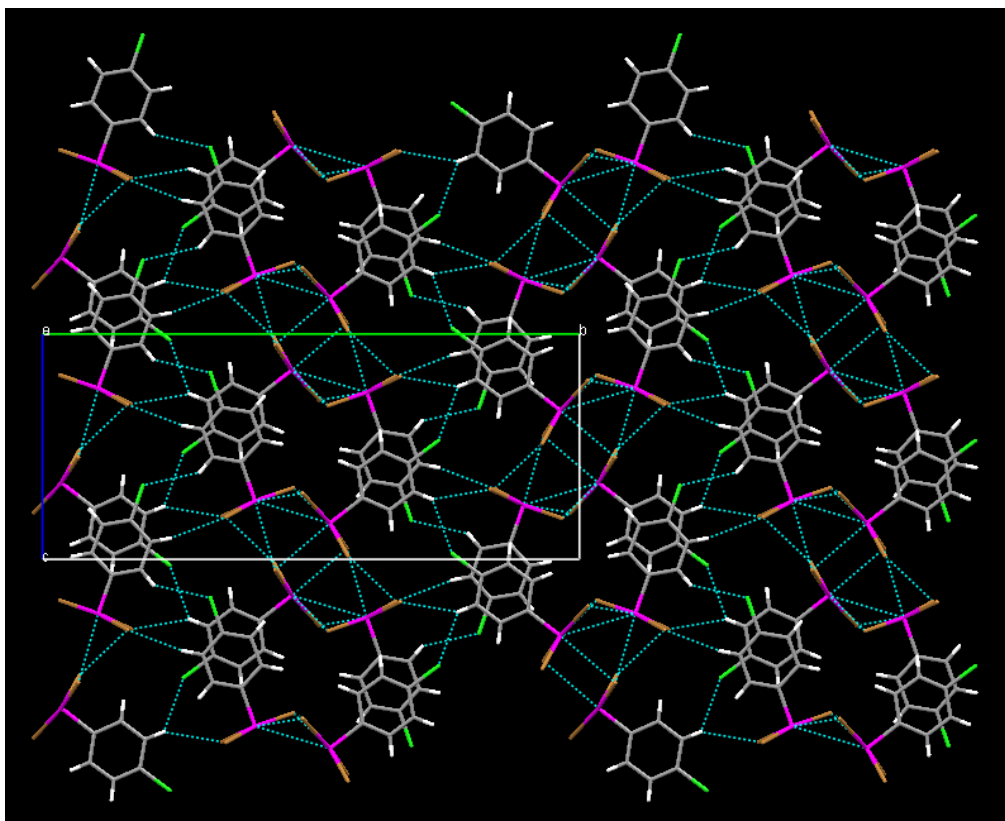

**Figure S5** Packing of (*p*-ClC<sub>6</sub>H<sub>4</sub>)SeBr<sub>3</sub> viewed down the crystallographic *a*-axis.

One noticeable difference between the structures of (*p*-ClC<sub>6</sub>H<sub>4</sub>)SeCl<sub>3</sub> and (*p*-ClC<sub>6</sub>H<sub>4</sub>)SeBr<sub>3</sub>, is that in the former the Se-Cl bonds participated directly in Se...Cl and Cl...Cl interactions between stacks. In (*p*-ClC<sub>6</sub>H<sub>4</sub>)SeBr<sub>3</sub> this is not observed. Instead, non-classical hydrogen bonding (either Cl...H or Br...H) is observed between the stacks. There are two short Cl...H contacts present, one to each of the two aryl chlorine atoms, Cl(1)...H(3): 2.85 Å and Cl(2)...H(12): 2.90 Å. The folded nature of the dimer results in only the two terminal bromine atoms Br(4) and Br(5) participating in hydrogen bonding, Br(4)...H(3): 3.02 Å and Br(5)...H(9): 3.02 Å. It should be noted that atom H(3) acts as a bifurcated H-bond donor interacting with both Cl(1) and Br(4).
